# Supplementary material for: GROOLS: reactive graph reasoning for genome annotation through biological processes
Source: Springer Nature journal article supplement (doi:10.1186/s12859-018-2126-1), 2018-04-11
Supplement: 12859_2018_2126_MOESM2_ESM.pdf [file 12859_2018_2126_MOESM2_ESM.pdf]

**Table 1:** Prediction accuracy and F1 scores for pathways (PWY) and functional units (FU) in 14 organisms

| Organisms (UniProtKB proteome)                |     | Genome Properties: UniProtKB annotations, falsehood mode |     |    |     |        |          | UniPathway: MicroScope annotations, specific mode |    |    |    |        |          |
|-----------------------------------------------|-----|----------------------------------------------------------|-----|----|-----|--------|----------|---------------------------------------------------|----|----|----|--------|----------|
|                                               |     | TP                                                       | TN  | FP | FN  | ACC    | F1 score | TP                                                | TN | FP | FN | ACC    | F1 score |
| Acinetobacter baylyi ADP1 (UP000000430)       | PWY | 13                                                       | 8   | 4  | 2   | 77.78% | 81.25%   | 21                                                | 10 | 5  | 3  | 79.49% | 84.00%   |
|                                               | FU  | 75                                                       | 104 | 14 | 3   | 91.33% | 89.82%   | 272                                               | 35 | 0  | 7  | 97.77% | 98.73%   |
| Pseudomonas putida KT2440 (UP000000556)       | PWY | 17                                                       | 6   | 4  | 2   | 79.31% | 85.00%   | 28                                                | 9  | 5  | 10 | 71.15% | 78.87%   |
|                                               | FU  | 96                                                       | 55  | 6  | 3   | 94.38% | 95.52%   | 222                                               | 35 | 2  | 19 | 92.45% | 95.48%   |
| Escherichia coli K-12 (UP000000625)           | PWY | 18                                                       | 4   | 5  | 1   | 78.57% | 85.71%   | 27                                                | 6  | 2  | 9  | 75.00% | 83.08%   |
|                                               | FU  | 138                                                      | 47  | 10 | 1   | 94.39% | 96.17%   | 111                                               | 17 | 5  | 15 | 86.49% | 91.74%   |
| Delftia acidovorans DSM14801 (UP000000784)    | PWY | 16                                                       | 6   | 3  | 2   | 81.48% | 86.49%   | 27                                                | 10 | 4  | 5  | 80.43% | 85.71%   |
|                                               | FU  | 105                                                      | 35  | 3  | 7   | 93.33% | 95.45%   | 96                                                | 34 | 7  | 25 | 80.25% | 85.71%   |
| Agrobacterium tumefaciens C58 (UP000000813)   | PWY | 17                                                       | 3   | 3  | 6   | 68.97% | 79.07%   | 25                                                | 2  | 2  | 12 | 65.85% | 78.13%   |
|                                               | FU  | 100                                                      | 25  | 6  | 56  | 66.84% | 76.34%   | 146                                               | 3  | 2  | 37 | 79.26% | 88.22%   |
| Pedobacter heparinus DSM2366 (UP000000852)    | PWY | 8                                                        | 7   | 1  | 9   | 60.00% | 61.54%   | 18                                                | 12 | 8  | 6  | 68.18% | 72.00%   |
|                                               | FU  | 62                                                       | 51  | 2  | 103 | 51.83% | 54.15%   | 68                                                | 51 | 19 | 32 | 70.00% | 72.73%   |
| Roseobacter litoralis DSM6996 (UP000001353)   | PWY | 11                                                       | 3   | 3  | 4   | 66.67% | 75.86%   | 20                                                | 4  | 3  | 1  | 85.71% | 90.91%   |
|                                               | FU  | 69                                                       | 29  | 3  | 10  | 88.29% | 91.39%   | 77                                                | 9  | 6  | 16 | 79.63% | 87.50%   |
| Bacillus subtilis 168 (UP000001570)           | PWY | 18                                                       | 4   | 3  | 1   | 84.62% | 90.00%   | 23                                                | 6  | 5  | 4  | 76.32% | 83.64%   |
|                                               | FU  | 130                                                      | 33  | 10 | 1   | 93.68% | 95.94%   | 296                                               | 26 | 0  | 18 | 94.71% | 97.05%   |
| Sphingomonas wittichii DSM6014 (UP000001989)  | PWY | 12                                                       | 4   | 6  | 5   | 59.26% | 68.57%   | 22                                                | 11 | 9  | 5  | 70.21% | 75.86%   |
|                                               | FU  | 85                                                       | 94  | 9  | 12  | 89.50% | 89.01%   | 87                                                | 59 | 14 | 12 | 84.88% | 87.00%   |
| Spirosoma linguale DSM74 (UP000002028)        | PWY | 10                                                       | 6   | 4  | 8   | 57.14% | 62.50%   | 18                                                | 11 | 5  | 4  | 76.32% | 80.00%   |
|                                               | FU  | 64                                                       | 54  | 6  | 84  | 56.73% | 58.72%   | 66                                                | 36 | 9  | 12 | 82.93% | 86.27%   |
| Chitinophaga pinensis DSM2588 (UP000002215)   | PWY | 9                                                        | 4   | 4  | 8   | 52.00% | 60.00%   | 18                                                | 12 | 10 | 5  | 66.67% | 70.59%   |
|                                               | FU  | 62                                                       | 40  | 15 | 49  | 61.45% | 65.96%   | 69                                                | 51 | 26 | 28 | 68.97% | 71.88%   |
| Pseudomonas aeruginosa PAO1 (UP000002438)     | PWY | 18                                                       | 3   | 3  | 4   | 75.00% | 83.72%   | 27                                                | 8  | 3  | 5  | 81.40% | 87.10%   |
|                                               | FU  | 130                                                      | 29  | 3  | 5   | 95.21% | 97.01%   | 108                                               | 27 | 5  | 17 | 85.99% | 90.76%   |
| Kytococcus sedentarius DSM20547 (UP000006666) | PWY | 3                                                        | 5   | 5  | 12  | 32.00% | 26.09%   | 15                                                | 16 | 7  | 9  | 65.96% | 65.22%   |
|                                               | FU  | 39                                                       | 90  | 14 | 61  | 63.24% | 50.98%   | 47                                                | 69 | 19 | 44 | 64.80% | 59.87%   |
| Salmonella typhimurium SL1344 (UP000008962)   | PWY | 14                                                       | 3   | 5  | 1   | 73.91% | 82.35%   | 21                                                | 13 | 9  | 2  | 75.56% | 79.25%   |
|                                               | FU  | 81                                                       | 24  | 16 | 1   | 86.07% | 90.50%   | 77                                                | 52 | 26 | 1  | 82.69% | 85.08%   |
