# Supplementary material for: GROOLS: reactive graph reasoning for genome annotation through biological processes
Source: Springer Nature journal article supplement (doi:10.1186/s12859-018-2126-1), 2018-04-11
Supplement: 12859_2018_2126_MOESM3_ESM.pdf [file 12859_2018_2126_MOESM3_ESM.pdf]

**GROOLS Prior Knowledge descriptions for both examples illustrated in figures 3 and 4**

**Table of Figure 3**

| Prior Knowledge | Description                                                                                                                                                                                                                                                                                                                                                                                                                                                                                                                                                                   | Expectation  | Prediction       | Conclusion            |
|-----------------|-------------------------------------------------------------------------------------------------------------------------------------------------------------------------------------------------------------------------------------------------------------------------------------------------------------------------------------------------------------------------------------------------------------------------------------------------------------------------------------------------------------------------------------------------------------------------------|--------------|------------------|-----------------------|
| GenProp0305     | cysteine biosynthesis~The biosynthesis of the amino acid cysteine may be achieved via several routes. Most commonly serine is the starting point (GenProp0218), while in the archaea a mis-charged cys-tRNA bearing O-phosphoserine is modified (GenProp0304).                                                                                                                                                                                                                                                                                                                | True - {{t}} | Both - {{t},{f}} | Contradictory absence |
| Evidence_85853  | GenProp0304 GENPROP                                                                                                                                                                                                                                                                                                                                                                                                                                                                                                                                                           | None - {{e}} | False - {{f}}    | Unconfirmed absence   |
| Component_48840 | serine O-acetyltransferase                                                                                                                                                                                                                                                                                                                                                                                                                                                                                                                                                    | True - {{t}} | False - {{f}}    | Unexpected absence    |
| Component_64077 | cysteine biosynthesis                                                                                                                                                                                                                                                                                                                                                                                                                                                                                                                                                         | True - {{t}} | Both - {{t},{f}} | Contradictory absence |
| Evidence_61338  | TIGR01138 HMM                                                                                                                                                                                                                                                                                                                                                                                                                                                                                                                                                                 | None - {{e}} | False - {{f}}    | Unconfirmed absence   |
| Component_51214 | O-phosphoserine synthetase                                                                                                                                                                                                                                                                                                                                                                                                                                                                                                                                                    | None - {{e}} | False - {{f}}    | Unconfirmed absence   |
| Evidence_85852  | GenProp0218 GENPROP                                                                                                                                                                                                                                                                                                                                                                                                                                                                                                                                                           | True - {{t}} | Both - {{t},{f}} | Contradictory absence |
| Component_48841 | cysteine synthase                                                                                                                                                                                                                                                                                                                                                                                                                                                                                                                                                             | True - {{t}} | True - {{t}}     | Confirmed presence    |
| GenProp0218     | cysteine biosynthesis from serine~The conversion of L-serine to L-cysteine takes two enzymatic steps, described here. The first step involves Serine acetyl-transferase, and the second step involves acetylserine lyase which forms L-cysteine.                                                                                                                                                                                                                                                                                                                              | True - {{t}} | Both - {{t},{f}} | Contradictory absence |
| Evidence_65816  | TIGR02539 HMM                                                                                                                                                                                                                                                                                                                                                                                                                                                                                                                                                                 | None - {{e}} | False - {{f}}    | Unconfirmed absence   |
| Component_51215 | Sep-tRNA:Cys-tRNA synthase                                                                                                                                                                                                                                                                                                                                                                                                                                                                                                                                                    | None - {{e}} | False - {{f}}    | Unconfirmed absence   |
| Evidence_61340  | TIGR01172 HMM                                                                                                                                                                                                                                                                                                                                                                                                                                                                                                                                                                 | True - {{t}} | False - {{f}}    | Unexpected absence    |
| GenProp0304     | cysteine biosynthesis, tRNA-dependent~Methanocaldococcus jannaschii is a model archaeal species that lacks a direct cys-tRNA ligase. In a system analogous to pyrrolysine and (in many species) asparagine tRNA aminoacylation, the tRNA is misacylated and then the attached amino acid is modified. This two-step pathway is conducted by proteins in the families of MJ1660 (sepS) and MJ1678 (pscS). This pathway assumes O-phosphoserine, whose biosynthesis is proposed to require D-3-phosphoglycerate dehydrogenase (TIGR01327) and an unidentified aminotransferase. | None - {{e}} | False - {{f}}    | Unconfirmed absence   |
| Evidence_61339  | TIGR01139 HMM                                                                                                                                                                                                                                                                                                                                                                                                                                                                                                                                                                 | True - {{t}} | True - {{t}}     | Confirmed presence    |
| Evidence_65815  | TIGR00470 HMM                                                                                                                                                                                                                                                                                                                                                                                                                                                                                                                                                                 | None - {{e}} | False - {{f}}    | Unconfirmed absence   |

**Table of Figure 4A**

| Prior Knowledge        | Description                                                                                                                                                      | Expectation  | Prediction   | Conclusion |
|------------------------|------------------------------------------------------------------------------------------------------------------------------------------------------------------|--------------|--------------|------------|
| UER00195               | L-asparagine from L-aspartate (L-Gln route): step 1/1~1 ATP + 1 H(2)O + 1 L-aspartate + 1 L-glutamine => 1 AMP + 1 L-asparagine + 1 L-glutamate + 1 diphosphate. | True - {{t}} | None - {{e}} | Missing    |
| UER00194               | L-asparagine from L-aspartate (ammonia route): step 1/1~1 ATP + 1 L-aspartate + 1 NH(3) => 1 AMP + 1 L-asparagine + 1 diphosphate.                               | True - {{t}} | None - {{e}} | Missing    |
| ULS00080               | L-asparagine from L-aspartate (ammonia route)                                                                                                                    | True - {{t}} | None - {{e}} | Missing    |
| UPA00134               | L-asparagine biosynthesis~Biosynthesis of L-asparagine amino-acid.                                                                                               | True - {{t}} | None - {{e}} | Missing    |
| ULS00081               | L-asparagine from L-aspartate (L-Gln route)                                                                                                                      | True - {{t}} | None - {{e}} | Missing    |
| VariantPath-1-UPA00134 |                                                                                                                                                                  | True - {{t}} | None - {{e}} | Missing    |
| VariantPath-2-UPA00134 |                                                                                                                                                                  | True - {{t}} | None - {{e}} | Missing    |

**Table of Figure 4B**

| Prior Knowledge        | Description                                                                                                                                                            | Expectation  | Prediction   | Conclusion         |
|------------------------|------------------------------------------------------------------------------------------------------------------------------------------------------------------------|--------------|--------------|--------------------|
| UER01034               | L-aspartyl-[tRNAAsn] from L-aspartate~a tRNAAsx + L-aspartate + ATP => an L-aspartyl-[tRNAAsx] + AMP + diphosphate                                                     | True - {{t}} | True - {{t}} | Confirmed presence |
| VariantPath-3-UPA00134 |                                                                                                                                                                        | True - {{t}} | True - {{t}} | Confirmed presence |
| UER01035               | L-asparaginyl-[tRNAasn] from L-aspartyl-[tRNAAsn]~L-glutamine + an L-aspartyl-[tRNAAsn] + ATP + H2O => L-glutamate + an L-asparaginyl-[tRNAasn] + ADP + phosphate + H+ | True - {{t}} | None - {{e}} | Missing            |
| UER00194               | L-asparagine from L-aspartate (ammonia route): step 1/1~1 ATP + 1 L-aspartate + 1 NH(3) => 1 AMP + 1 L-asparagine + 1 diphosphate.                                     | None - {{e}} | None - {{e}} | Unexplained        |
| ULS00080               | L-asparagine from L-aspartate (ammonia route)                                                                                                                          | None - {{e}} | None - {{e}} | Unexplained        |
| UPA00134               | L-asparagine biosynthesis~Biosynthesis of L-asparagine amino-acid.                                                                                                     | True - {{t}} | True - {{t}} | Confirmed presence |
| UER01036               | L-asparagine from L-asparaginyl-[tRNAasn]~an L-asparaginyl-[tRNAasn] + H2O => L-asparagine + tRNAasn                                                                   | True - {{t}} | True - {{t}} | Confirmed presence |
| ULS00081               | L-asparagine from L-aspartate (L-Gln route)                                                                                                                            | None - {{e}} | None - {{e}} | Unexplained        |
| VariantPath-2-UPA00134 |                                                                                                                                                                        | None - {{e}} | None - {{e}} | Unexplained        |
| ULS00511               | L-asparagine from L-aspartate (tRNA-dependent route)                                                                                                                   | True - {{t}} | True - {{t}} | Confirmed presence |
| VariantPath-1-UPA00134 |                                                                                                                                                                        | None - {{e}} | None - {{e}} | Unexplained        |
| UER00195               | L-asparagine from L-aspartate (L-Gln route): step 1/1~1 ATP + 1 H(2)O + 1 L-aspartate + 1 L-glutamine => 1 AMP + 1 L-asparagine + 1 L-glutamate + 1 diphosphate.       | None - {{e}} | None - {{e}} | Unexplained        |
